# Supplementary material
Source: MDPI journal article supplement (https://www.mdpi.com/1999-4907/14/4/770)
Supplement: s1 [file s1]

# Supplementary Materials:

**Table S1.** Raw data for Figure 1D

| Metabolites Name                                         | Treatment Name |          |          |          |
|----------------------------------------------------------|----------------|----------|----------|----------|
|                                                          | M2n            | M4n      | S2n      | S4n      |
| Phloretin-2'-O-glucoside (Phlorizin)                     | 3.89E+06       | 2.63E+06 | 2.41E+06 | 1.68E+06 |
| Kaempferol-3-O-(4''-O-acetyl) rhamnoside                 | 1.72E+07       | 1.13E+07 | 8.31E+06 | 2.84E+06 |
| Eriodictyol (5,7,3',4'-Tetrahydroxyflavanone)            | 4.44E+06       | 4.79E+05 | 1.50E+06 | 4.97E+04 |
| 5,7,3',4',5'-Pentahydroxydihydroflavone                  | 1.65E+07       | 2.24E+05 | 3.29E+06 | 2.33E+04 |
| Syringetin                                               | 5.73E+07       | 7.28E+05 | 1.59E+07 | 1.92E+05 |
| Naringenin (5,7,4'-Trihydroxyflavanone)                  | 1.68E+06       | 1.81E+05 | 2.79E+05 | 1.89E+04 |
| Quercetin-3-O-(2''-acetyl) rhamnoside                    | 2.42E+06       | 8.54E+05 | 8.02E+05 | 3.02E+05 |
| 3,5,7,2'-Tetrahydroxyflavone; Datiscetin                 | 1.38E+05       | 5.67E+04 | 1.98E+05 | 2.78E+04 |
| Kaempferol (3,5,7,4'-Tetrahydroxyflavone)                | 2.04E+05       | 8.35E+04 | 2.80E+05 | 3.83E+04 |
| Kaempferol-3-O-(6''-p-Coumaroyl) glucoside (Tiliroside)  | 3.01E+06       | 4.56E+04 | 5.17E+06 | 8.76E+05 |
| Quercetin-3-O-galactoside (Hyperin)                      | 1.05E+07       | 8.18E+05 | 1.50E+07 | 3.39E+06 |
| Luteolin-7-O-(6''-caffeoyl) rhamnoside                   | 1.22E+06       | 1.44E+04 | 1.78E+06 | 2.85E+05 |
| Isohyperoside                                            | 2.40E+06       | 5.26E+05 | 1.98E+06 | 1.39E+06 |
| Quercetin-3-O-sambubioside                               | 1.80E+06       | 4.51E+05 | 1.48E+06 | 9.75E+05 |
| Kaempferol-7-O-rhamnoside                                | 1.35E+06       | 4.77E+05 | 1.36E+06 | 6.45E+05 |
| Kaempferol-3-O-rhamnoside (Afzelin)                      | 1.27E+06       | 4.41E+05 | 1.31E+06 | 5.91E+05 |
| Dihydrokaempferol-3-O-glucoside                          | 3.78E+06       | 2.21E+05 | 4.15E+06 | 1.13E+06 |
| Taxifolin-3'-O-glucoside                                 | 3.34E+06       | 2.50E+05 | 3.71E+06 | 8.13E+05 |
| Kaempferol-3-O-sambubioside                              | 9.19E+05       | 3.94E+04 | 9.91E+05 | 1.79E+05 |
| Quercetin-3-O-(6''-p-Coumaroyl) galactoside              | 4.98E+06       | 2.42E+05 | 5.01E+06 | 2.09E+06 |
| Quercetin-3-O-(2''-O-galactosyl) glucoside               | 5.01E+05       | 1.31E+04 | 4.20E+05 | 1.74E+05 |
| Quercetin-3-O-glucoside (Isoquercitrin)                  | 1.43E+07       | 7.90E+05 | 1.33E+07 | 3.94E+06 |
| Quercetin-7-O-glucoside                                  | 6.66E+07       | 5.69E+06 | 6.40E+07 | 2.13E+07 |
| Quercetin-3-O-(6''-p-Coumaroyl) glucoside                | 4.78E+05       | 1.91E+04 | 5.06E+05 | 1.72E+04 |
| Gallocatechin 3-O-gallate                                | 1.99E+06       | 4.14E+05 | 2.23E+06 | 7.46E+04 |
| Epigallocatechin-3-gallate                               | 1.70E+06       | 3.28E+05 | 1.86E+06 | 5.62E+04 |
| Catechin                                                 | 5.19E+05       | 2.89E+05 | 5.19E+05 | 1.64E+05 |
| Epicatechin                                              | 2.44E+06       | 1.39E+06 | 2.39E+06 | 8.27E+05 |
| 5,7-Dihydroxy-4-methoxyflavone-3-O-xylose-(1-6)-glucose  | 4.02E+06       | 1.31E+06 | 3.77E+06 | 1.01E+06 |
| Epigallocatechin                                         | 2.55E+07       | 6.37E+06 | 2.18E+07 | 3.43E+06 |
| Kaempferol-3-O-arabinoside                               | 2.00E+07       | 3.85E+06 | 1.62E+07 | 1.30E+06 |
| Dihydrokaempferide                                       | 2.36E+06       | 1.44E+06 | 1.93E+06 | 1.05E+06 |
| Avicularin(Quercetin-3-O- $\alpha$ -L-arabinofuranoside) | 6.99E+06       | 2.54E+06 | 5.03E+06 | 1.41E+06 |
| Limocitrin-3-O-galactoside                               | 4.83E+06       | 9.67E+05 | 3.07E+06 | 3.12E+05 |
| Gallocatechin                                            | 2.44E+06       | 6.33E+05 | 1.81E+06 | 2.82E+05 |
| Myricetin-3-O-glucoside                                  | 1.53E+07       | 2.41E+06 | 1.09E+07 | 1.19E+06 |
| Taxifolin-3-O-rhamnoside (Astilbin)                      | 1.09E+06       | 7.72E+04 | 5.58E+05 | 1.79E+05 |
| Quercetin-3-O-rhamnoside (Quercitrin)                    | 1.29E+07       | 3.47E+06 | 8.50E+06 | 4.14E+06 |
| Quercetin-3-O-rutinoside (Rutin)                         | 1.02E+07       | 5.70E+05 | 5.56E+06 | 4.79E+05 |
| Kaempferol-3-O-galactoside (Trifolin)                    | 8.23E+06       | 1.57E+05 | 7.16E+06 | 9.76E+05 |
| Myricetin-3-O-rhamnoside (Myricitrin)                    | 4.41E+07       | 2.44E+05 | 3.79E+07 | 2.57E+05 |
| Kaempferol-3-O-rutinoside (Nicotiflorin)                 | 9.58E+06       | 2.09E+04 | 7.55E+06 | 4.47E+04 |
| Kaempferol-3-O-glucoside (Astragalin)                    | 3.85E+06       | 6.71E+05 | 3.01E+06 | 1.17E+06 |
| 6,7,8-Tetrahydroxy-5-methoxyflavone                      | 5.88E+06       | 9.00E+00 | 4.11E+06 | 3.25E+05 |

|                                                               |          |          |          |          |
|---------------------------------------------------------------|----------|----------|----------|----------|
| 3-O-Methylquercetin                                           | 1.78E+06 | 5.17E+04 | 1.25E+06 | 1.95E+04 |
| Myricetin-3-O-arabinoside                                     | 8.17E+06 | 9.67E+04 | 5.49E+06 | 3.41E+04 |
| Isorhamnetin-7-O-glucoside (Brassicin)                        | 3.40E+06 | 2.45E+06 | 3.18E+06 | 4.63E+06 |
| Kaempferol-3-O-glucuronide-7-O-glucoside                      | 9.00E+00 | 3.28E+04 | 9.00E+00 | 4.65E+04 |
| Diosmetin-7-O-galactoside                                     | 9.51E+04 | 6.19E+06 | 1.51E+05 | 7.33E+06 |
| Kaempferol-3-O-glucuronide                                    | 9.00E+00 | 1.01E+06 | 9.00E+00 | 1.26E+06 |
| Dihydroxy-dimethoxyflavone-7-O-glucoside                      | 1.96E+04 | 2.57E+06 | 2.75E+03 | 3.30E+06 |
| Apigenin-6-C-glucoside (Isovitexin)                           | 6.64E+04 | 7.86E+04 | 5.15E+04 | 1.12E+05 |
| Catechin-(7,8-bc)-4β-(3,4-dihydroxyphenyl)-dihydro-2-(3H)-one | 3.29E+04 | 1.78E+06 | 3.70E+04 | 4.37E+06 |
| Dihydroquercetin (Taxifolin)                                  | 5.82E+04 | 1.57E+05 | 2.66E+05 | 1.91E+05 |
| Epicatechin glucoside                                         | 1.87E+05 | 2.78E+05 | 1.05E+06 | 4.69E+05 |
| Cyanidin-3-O-glucoside (Kuromanin)                            | 5.75E+05 | 6.25E+05 | 1.86E+07 | 1.11E+06 |
| Eriodictyol-3'-O-glucoside                                    | 7.65E+05 | 7.94E+05 | 3.22E+06 | 9.64E+05 |
| Kaempferol-3,7-di-O-glucoside                                 | 9.72E+05 | 1.18E+05 | 2.62E+06 | 7.98E+05 |
| Kaempferol-3-O-sophorotrioside                                | 6.29E+04 | 2.90E+04 | 1.37E+05 | 5.83E+04 |
| Kaempferol-3,7-O-dirhamnoside (Kaempferitrin)                 | 1.52E+05 | 9.00E+00 | 5.94E+05 | 7.19E+03 |
| Apiferol                                                      | 2.49E+05 | 1.73E+05 | 9.53E+05 | 9.95E+03 |
| Naringenin-7-O-glucoside (Prunin)                             | 2.60E+06 | 2.25E+06 | 8.70E+06 | 1.48E+06 |
| Apigenin-5-O-glucoside                                        | 9.00E+00 | 1.23E+05 | 9.00E+00 | 8.25E+04 |
| Luteolin-7-O-glucuronide                                      | 9.00E+00 | 1.17E+07 | 9.00E+00 | 7.89E+06 |
| Quercetin-3-O-(2''-O-glucosyl) glucuronide                    | 9.00E+00 | 1.94E+05 | 9.00E+00 | 1.01E+05 |
| Quercetin-5-O-glucuronide                                     | 9.00E+00 | 1.30E+07 | 9.00E+00 | 5.35E+06 |
| Hispidulin (5,7,4'-Trihydroxy-6-methoxyflavone)               | 8.18E+04 | 1.74E+07 | 3.31E+04 | 7.62E+06 |
| Diosmetin (5,7,3'-Trihydroxy-4'-methoxyflavone)               | 2.55E+04 | 1.02E+07 | 3.79E+04 | 4.61E+06 |
| Quercetin-3-O-(6''-acetyl) galactoside                        | 4.15E+04 | 8.12E+05 | 8.36E+04 | 3.56E+05 |
| Quercetin-3-O-(6''-malonyl) galactoside                       | 5.13E+04 | 1.31E+06 | 1.24E+05 | 6.24E+05 |
| Tricin-7-O-Glucoside                                          | 1.92E+05 | 8.40E+06 | 1.36E+05 | 1.02E+06 |
| Tricin-4'-O-glucoside                                         | 2.14E+05 | 8.15E+06 | 1.38E+05 | 1.09E+06 |
| 7-O-Methyleriodictyol                                         | 2.36E+04 | 9.25E+05 | 9.00E+00 | 2.09E+04 |
| Tricin (5,7,4'-Trihydroxy-3',5'-dimethoxyflavone)             | 1.73E+05 | 2.36E+07 | 6.76E+04 | 1.29E+06 |
| 7-O-Methylnaringenin                                          | 5.88E+04 | 2.96E+05 | 8.37E+03 | 3.85E+04 |
| Luteolin (5,7,3',4'-Tetrahydroxyflavone)                      | 2.47E+04 | 2.24E+05 | 1.32E+04 | 1.40E+04 |
| Kaempferide-3-O-glucuronide                                   | 8.79E+03 | 4.43E+04 | 6.54E+03 | 5.86E+03 |
| Catechin-catechin-catechin                                    | 2.82E+04 | 9.92E+04 | 3.95E+04 | 4.11E+04 |
| Kaempferol-3-O-(6''-acetyl) glucoside                         | 7.13E+04 | 1.04E+06 | 2.36E+05 | 4.22E+05 |
| Myricetin-3-O-glucuronide                                     | 4.91E+03 | 4.04E+07 | 2.75E+03 | 9.05E+06 |
| Kaempferol-3-O-(6''-malonyl) glucoside                        | 9.59E+04 | 2.41E+06 | 2.86E+05 | 6.70E+05 |
| Kaempferol-3-O-(6''-malonyl) galactoside                      | 9.88E+04 | 2.50E+06 | 2.63E+05 | 6.39E+05 |
| Kaempferol-3-O-(4''-O-p-Coumaroyl) rhamnoside                 | 1.72E+07 | 1.88E+07 | 5.58E+06 | 5.04E+05 |
| Catechin-(7,8-bc)-4α-(3,4-dihydroxyphenyl)-dihydro-2-(3H)-one | 2.29E+07 | 2.35E+07 | 2.01E+07 | 1.99E+07 |
| Kaempferol-3-O-(3''-O-p-Coumaroyl) rhamnoside                 | 2.14E+07 | 2.69E+07 | 5.22E+06 | 9.27E+05 |
| Quercetin                                                     | 4.47E+05 | 5.25E+05 | 3.62E+05 | 1.22E+05 |
| Kaempferol-3-O-(2''-p-Coumaroyl) glucoside                    | 7.96E+05 | 7.02E+05 | 4.41E+05 | 5.19E+04 |
| Phloretin                                                     | 1.57E+06 | 4.15E+06 | 1.93E+06 | 1.59E+05 |
| Aromadendrin (Dihydrokaempferol)                              | 2.00E+05 | 2.37E+05 | 2.60E+05 | 2.79E+04 |

Table S2. Raw data for Figure 2

| Glucoside Type | Metabolites Name | Treatment Name |
|----------------|------------------|----------------|
|----------------|------------------|----------------|

|                 |                                  | M2n      | M4n      | S2n      | S4n      |
|-----------------|----------------------------------|----------|----------|----------|----------|
| arabinoside     | Kaempferol-3-O-arabinoside       | 2.00E+07 | 3.85E+06 | 1.62E+07 | 1.30E+06 |
| arabinoside     | Avicularin                       | 6.99E+06 | 2.54E+06 | 5.03E+06 | 1.41E+06 |
| arabinoside     | Myricetin-3-O-arabinoside        | 8.17E+06 | 9.67E+04 | 5.49E+06 | 3.41E+04 |
| galactoside     | Diosmetin-7-O-galactoside        | 9.51E+04 | 6.19E+06 | 1.51E+05 | 7.33E+06 |
| galactoside     | Limocitrin-3-O-galactoside       | 4.83E+06 | 9.67E+05 | 3.07E+06 | 3.12E+05 |
| galactoside     | Hyperin                          | 1.05E+07 | 8.18E+05 | 1.50E+07 | 3.39E+06 |
| galactoside     | Trifolin                         | 8.23E+06 | 1.57E+05 | 7.16E+06 | 9.76E+05 |
|                 | Quercetin-3-O-(6"-acetyl) galac- |          |          |          |          |
| galactoside     | toside                           | 4.15E+04 | 8.12E+05 | 8.36E+04 | 3.56E+05 |
|                 | Kaempferol-3-O-(6"-malonyl) ga-  |          |          |          |          |
| galactoside     | lactoside                        | 9.88E+04 | 2.50E+06 | 2.63E+05 | 6.39E+05 |
|                 | Quercetin-3-O-(6"-malonyl) ga-   |          |          |          |          |
| galactoside     | lactoside                        | 5.13E+04 | 1.31E+06 | 1.24E+05 | 6.24E+05 |
|                 | Quercetin-3-O-(6"-p-Coumaroyl)   |          |          |          |          |
| galactoside     | galactoside                      | 4.98E+06 | 2.42E+05 | 5.01E+06 | 2.09E+06 |
| galactoside     | Isohyperoside                    | 2.40E+06 | 5.26E+05 | 1.98E+06 | 1.39E+06 |
| dirhamnoside    | Kaempferitrin                    | 1.52E+05 | 9.00E+00 | 5.94E+05 | 7.19E+03 |
| sophorotrioside | Kaempferol-3-O-sophorotrioside   | 6.29E+04 | 2.90E+04 | 1.37E+05 | 5.83E+04 |
| glucoside       | Phloretin-2'-O-glucoside         | 3.89E+06 | 2.63E+06 | 2.41E+06 | 1.68E+06 |
| glucoside       | Naringenin-7-O-glucoside         | 2.60E+06 | 2.25E+06 | 8.70E+06 | 1.48E+06 |
| glucoside       | Eriodictyol-3'-O-glucoside       | 7.65E+05 | 7.94E+05 | 3.22E+06 | 9.64E+05 |
|                 | Dihydrokaempferol-3-O-gluco-     |          |          |          |          |
| glucoside       | side                             | 3.78E+06 | 2.21E+05 | 4.15E+06 | 1.13E+06 |
| glucoside       | Kuromanin                        | 5.75E+05 | 6.25E+05 | 1.86E+07 | 1.11E+06 |
| glucoside       | Apigenin-5-O-glucoside           | 9.00E+00 | 1.23E+05 | 9.00E+00 | 8.25E+04 |
| glucoside       | Taxifolin-3'-O-glucoside         | 3.34E+06 | 2.50E+05 | 3.71E+06 | 8.13E+05 |
|                 | Dihydroxy-dimethoxyflavone-7-    |          |          |          |          |
| glucoside       | O-glucoside                      | 1.96E+04 | 2.57E+06 | 2.75E+03 | 3.30E+06 |
| glucoside       | Tricin-7-O-Glucoside             | 1.92E+05 | 8.40E+06 | 1.36E+05 | 1.02E+06 |
| glucoside       | Tricin-4'-O-glucoside            | 2.14E+05 | 8.15E+06 | 1.38E+05 | 1.09E+06 |
|                 | Kaempferol-3-O-(2"-p-Couma-      |          |          |          |          |
| glucoside       | royl) glucoside                  | 7.96E+05 | 7.02E+05 | 4.41E+05 | 5.19E+04 |
| glucoside       | Kaempferol-3,7-di-O-glucoside    | 9.72E+05 | 1.18E+05 | 2.62E+06 | 7.98E+05 |
| glucoside       | Brassicin                        | 3.40E+06 | 2.45E+06 | 3.18E+06 | 4.63E+06 |
|                 | Quercetin-3-O-(2"-O-galactosyl)  |          |          |          |          |
| glucoside       | glucoside                        | 5.01E+05 | 1.31E+04 | 4.20E+05 | 1.74E+05 |
| glucoside       | Quercetin-7-O-glucoside          | 6.66E+07 | 5.69E+06 | 6.40E+07 | 2.13E+07 |
| glucoside       | Astragalin                       | 3.85E+06 | 6.71E+05 | 3.01E+06 | 1.17E+06 |
| glucoside       | Isoquercitrin                    | 1.43E+07 | 7.90E+05 | 1.33E+07 | 3.94E+06 |
| glucoside       | Tiliroside                       | 3.01E+06 | 4.56E+04 | 5.17E+06 | 8.76E+05 |
| glucoside       | Myricetin-3-O-glucoside          | 1.53E+07 | 2.41E+06 | 1.09E+07 | 1.19E+06 |
|                 | Kaempferol-3-O-(6"-acetyl) glu-  |          |          |          |          |
| glucoside       | coside                           | 7.13E+04 | 1.04E+06 | 2.36E+05 | 4.22E+05 |
|                 | Kaempferol-3-O-(6"-malo-         |          |          |          |          |
| glucoside       | nyl)glucoside                    | 9.59E+04 | 2.41E+06 | 2.86E+05 | 6.70E+05 |
|                 | Quercetin-3-O-(6"-p-Coumaroyl)   |          |          |          |          |
| glucoside       | glucoside                        | 4.78E+05 | 1.91E+04 | 5.06E+05 | 1.72E+04 |
|                 | Kaempferol-3-O-glucuronide-7-    |          |          |          |          |
| glucoside       | O-glucoside                      | 9.00E+00 | 3.28E+04 | 9.00E+00 | 4.65E+04 |

|              |                                  |          |          |          |          |
|--------------|----------------------------------|----------|----------|----------|----------|
| glucoside    | Isovitexin                       | 6.64E+04 | 7.86E+04 | 5.15E+04 | 1.12E+05 |
| glucuronide  | Luteolin-7-O-glucuronide         | 9.00E+00 | 1.17E+07 | 9.00E+00 | 7.89E+06 |
| glucuronide  | Myricetin-3-O-glucuronide        | 4.91E+03 | 4.04E+07 | 2.75E+03 | 9.05E+06 |
| glucuronide  | Kaempferol-3-O-glucuronide       | 9.00E+00 | 1.01E+06 | 9.00E+00 | 1.26E+06 |
| glucuronide  | Kaempferide-3-O-glucuronide      | 8.79E+03 | 4.43E+04 | 6.54E+03 | 5.86E+03 |
| glucuronide  | Quercetin-5-O-glucuronide        | 9.00E+00 | 1.30E+07 | 9.00E+00 | 5.35E+06 |
|              | Quercetin-3-O-(2"-O-glucosyl)    |          |          |          |          |
| glucuronide  | glucuronide                      | 9.00E+00 | 1.94E+05 | 9.00E+00 | 1.01E+05 |
| sambubioside | Kaempferol-3-O-sambubioside      | 9.19E+05 | 3.94E+04 | 9.91E+05 | 1.79E+05 |
| sambubioside | Quercetin-3-O-sambubioside       | 1.80E+06 | 4.51E+05 | 1.48E+06 | 9.75E+05 |
| rhamnoside   | Taxifolin-3-O-rhamnoside         | 1.09E+06 | 7.72E+04 | 5.58E+05 | 1.79E+05 |
|              | Kaempferol-3-O-(4"-O-acetyl)     |          |          |          |          |
| rhamnoside   | rhamnoside                       | 1.72E+07 | 1.13E+07 | 8.31E+06 | 2.84E+06 |
|              | Kaempferol-3-O-(3"-O-p-Couma-    |          |          |          |          |
| rhamnoside   | royl) rhamnoside                 | 2.14E+07 | 2.69E+07 | 5.22E+06 | 9.27E+05 |
|              | Kaempferol-3-O-(4"-O-p-Couma-    |          |          |          |          |
| rhamnoside   | royl) rhamnoside                 | 1.72E+07 | 1.88E+07 | 5.58E+06 | 5.04E+05 |
|              | Luteolin-7-O-(6"-caffeoyl) rham- |          |          |          |          |
| rhamnoside   | noside                           | 1.22E+06 | 1.44E+04 | 1.78E+06 | 2.85E+05 |
| rhamnoside   | Quercitrin                       | 1.29E+07 | 3.47E+06 | 8.50E+06 | 4.14E+06 |
| rhamnoside   | Afzelin                          | 1.27E+06 | 4.41E+05 | 1.31E+06 | 5.91E+05 |
| rhamnoside   | Kaempferol-7-O-rhamnoside        | 1.35E+06 | 4.77E+05 | 1.36E+06 | 6.45E+05 |
| rhamnoside   | Myricitrin                       | 4.41E+07 | 2.44E+05 | 3.79E+07 | 2.57E+05 |
|              | Quercetin-3-O-(2"-acetyl) rham-  |          |          |          |          |
| rhamnoside   | noside                           | 2.42E+06 | 8.54E+05 | 8.02E+05 | 3.02E+05 |
| rutinoside   | Nicotiflorin                     | 9.58E+06 | 2.09E+04 | 7.55E+06 | 4.47E+04 |
| rutinoside   | Rutin                            | 1.02E+07 | 5.70E+05 | 5.56E+06 | 4.79E+05 |

Table S3. Gene structures obtained from DEGs.

| Gene ID      | Gene Name | Log <sub>2</sub> (FC) |             | FDR         |             |
|--------------|-----------|-----------------------|-------------|-------------|-------------|
|              |           | M2n vs. M4n           | S2n vs. S4n | M2n vs. M4n | S2n vs. S4n |
| CpaM1st03529 | UGT85     | 2.036599              | -6.07085    | NA          | 0.009144    |
| CpaM1st04091 | UGT85     | 0.301057              | -1.64594    | 0.931383    | 0.000816    |
| CpaM1st06427 | 4CL       | 0.795167              | 2.280188    | 0.791895    | 0.000151    |
| CpaM1st11173 | UGT87     | -2.26984              | -1.00121    | 0.12262     | 0.23054     |
| CpaM1st11329 | UGT74     | 0.381101              | 3.02429     | 0.93503     | 1.38E-08    |
| CpaM1st12118 | UGT84     | 7.754754              | 3.994756    | 0.02841     | NA          |
| CpaM1st23532 | UGT71     | -0.13517              | -0.76396    | 0.967328    | 0.444633    |
| CpaM1st23533 | UGT71     | 0.013573              | -0.74267    | 0.997461    | 0.389719    |
| CpaM1st24387 | UGT90     | -1.74616              | -1.13933    | 1.37E-05    | 0.000198    |
| CpaM1st24780 | CHS       | 2.506459              | 1.844395    | 0.670378    | 1.44E-08    |
| CpaM1st26423 | UGT89     | 0.888685              | 2.481774    | 0.866856    | 0.00019     |
| CpaM1st33727 | UGT91     | -1.20169              | -1.13256    | 0.760835    | 0.051934    |
| CpaM1st35688 | UGT85     | 0.834253              | 2.957005    | 0.970108    | 8.04E-07    |
| CpaM1st35689 | UGT85     | 0.981725              | 3.662795    | 0.95617     | 4.83E-06    |
| CpaM1st36909 | UGT78     | 1.313037              | 3.469082    | 0.785133    | 0.006097    |
| CpaM1st36911 | UGT78     | 0.388794              | 5.360547    | 0.936779    | 0.000932    |
| CpaM1st36913 | UGT78     | 0.954847              | 5.35243     | 0.795643    | 0.037182    |

|              |              |          |          |          |          |
|--------------|--------------|----------|----------|----------|----------|
| CpaM1st40682 | <i>UGT73</i> | -2.03348 | -0.55367 | 0.029012 | 0.770968 |
| CpaM1st43651 | <i>UGT78</i> | 1.435794 | 2.124905 | NA       | 0.028364 |
| CpaM1st43771 | <i>UGT85</i> | 0.614016 | 2.914918 | 0.923662 | 5.62E-06 |
| CpaM1st47151 | <i>PAL</i>   | 0.754805 | 1.445957 | 0.777863 | 0.00422  |

**Table S4.** TFs obtained from DEGs.

| Gene Id      | Gene Name    | Gene Id      | Gene Name          | Gene Id      | Gene Name          |
|--------------|--------------|--------------|--------------------|--------------|--------------------|
| CpaM1st06663 | <i>AP2</i>   | CpaM1st05007 | <i>ERF</i>         | CpaM1st08623 | <i>MYB</i>         |
| CpaM1st15655 | <i>ARF</i>   | CpaM1st12838 | <i>ERF</i>         | CpaM1st15012 | <i>MYB</i>         |
| CpaM1st27253 | <i>ARF</i>   | CpaM1st21183 | <i>ERF</i>         | CpaM1st17430 | <i>MYB</i>         |
| CpaM1st28900 | <i>ARF</i>   | CpaM1st22877 | <i>ERF</i>         | CpaM1st25404 | <i>MYB</i>         |
| CpaM1st01599 | <i>ARR-B</i> | CpaM1st32520 | <i>ERF</i>         | CpaM1st28082 | <i>MYB</i>         |
| CpaM1st01963 | <i>ARR-B</i> | CpaM1st33089 | <i>ERF</i>         | CpaM1st36014 | <i>MYB</i>         |
| CpaM1st16936 | <i>ARR-B</i> | CpaM1st35260 | <i>ERF</i>         | CpaM1st17931 | <i>MYB_related</i> |
| CpaM1st06331 | <i>BES1</i>  | CpaM1st51484 | <i>ERF</i>         | CpaM1st33832 | <i>MYB_related</i> |
| CpaM1st06558 | <i>BES1</i>  | CpaM1st20930 | <i>FAR1</i>        | CpaM1st01029 | <i>NAC</i>         |
| CpaM1st18924 | <i>bHLH</i>  | CpaM1st39296 | <i>G2-like</i>     | CpaM1st19975 | <i>NAC</i>         |
| CpaM1st19476 | <i>bHLH</i>  | CpaM1st40361 | <i>G2-like</i>     | CpaM1st35362 | <i>NAC</i>         |
| CpaM1st20322 | <i>bHLH</i>  | CpaM1st01234 | <i>GRAS</i>        | CpaM1st35427 | <i>NAC</i>         |
| CpaM1st30271 | <i>bHLH</i>  | CpaM1st02029 | <i>GRAS</i>        | CpaM1st36195 | <i>NAC</i>         |
| CpaM1st31844 | <i>bHLH</i>  | CpaM1st04762 | <i>GRAS</i>        | CpaM1st39970 | <i>NAC</i>         |
| CpaM1st31909 | <i>bHLH</i>  | CpaM1st21506 | <i>GRAS</i>        | CpaM1st46075 | <i>NF-YA</i>       |
| CpaM1st41917 | <i>bHLH</i>  | CpaM1st20598 | <i>HB-other</i>    | CpaM1st34196 | <i>NF-YC</i>       |
| CpaM1st43854 | <i>bHLH</i>  | CpaM1st19816 | <i>HD-ZIP</i>      | CpaM1st32369 | <i>SBP</i>         |
| CpaM1st18833 | <i>bZIP</i>  | CpaM1st32910 | <i>HSF</i>         | CpaM1st06573 | <i>TALE</i>        |
| CpaM1st42789 | <i>bZIP</i>  | CpaM1st10706 | <i>LBD</i>         | CpaM1st15546 | <i>TALE</i>        |
| CpaM1st02167 | <i>C2H2</i>  | CpaM1st17962 | <i>LBD</i>         | CpaM1st12337 | <i>Trihelix</i>    |
| CpaM1st04710 | <i>C2H2</i>  | CpaM1st41973 | <i>LBD</i>         | CpaM1st13185 | <i>Whirly</i>      |
| CpaM1st03906 | <i>C3H</i>   | CpaM1st24150 | <i>MIKC_MADS</i>   | CpaM1st24145 | <i>WRKY</i>        |
| CpaM1st30794 | <i>C3H</i>   | CpaM1st25222 | <i>MIKC_MADS</i>   | CpaM1st30889 | <i>WRKY</i>        |
| CpaM1st39993 | <i>C3H</i>   | CpaM1st03571 | <i>M-type_MADS</i> | CpaM1st34874 | <i>WRKY</i>        |
| CpaM1st11438 | <i>EIL</i>   | CpaM1st04757 | <i>MYB</i>         |              |                    |

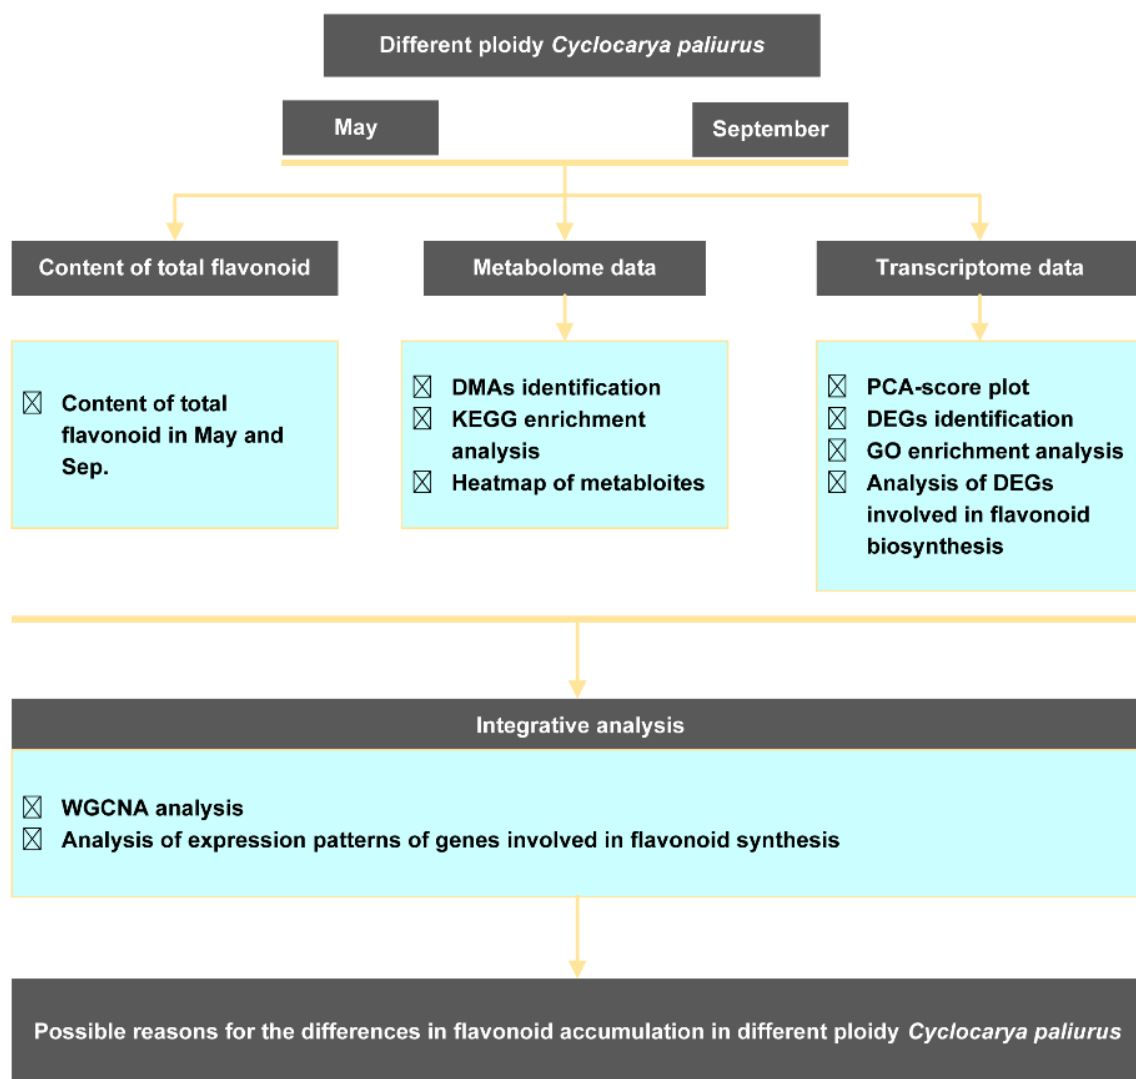

**Figure S1.** Framework and analytical process for this study, presents the technical roadmap and analytical process that will be followed in this article.

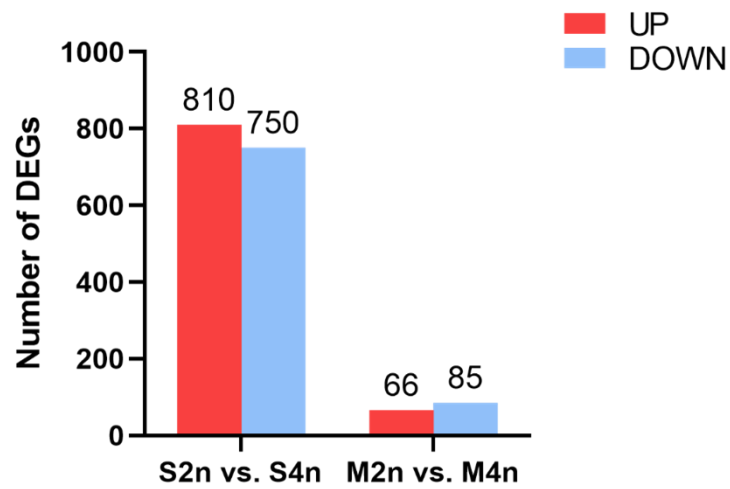

Figure S2. Column plot showing the number of DEGs.

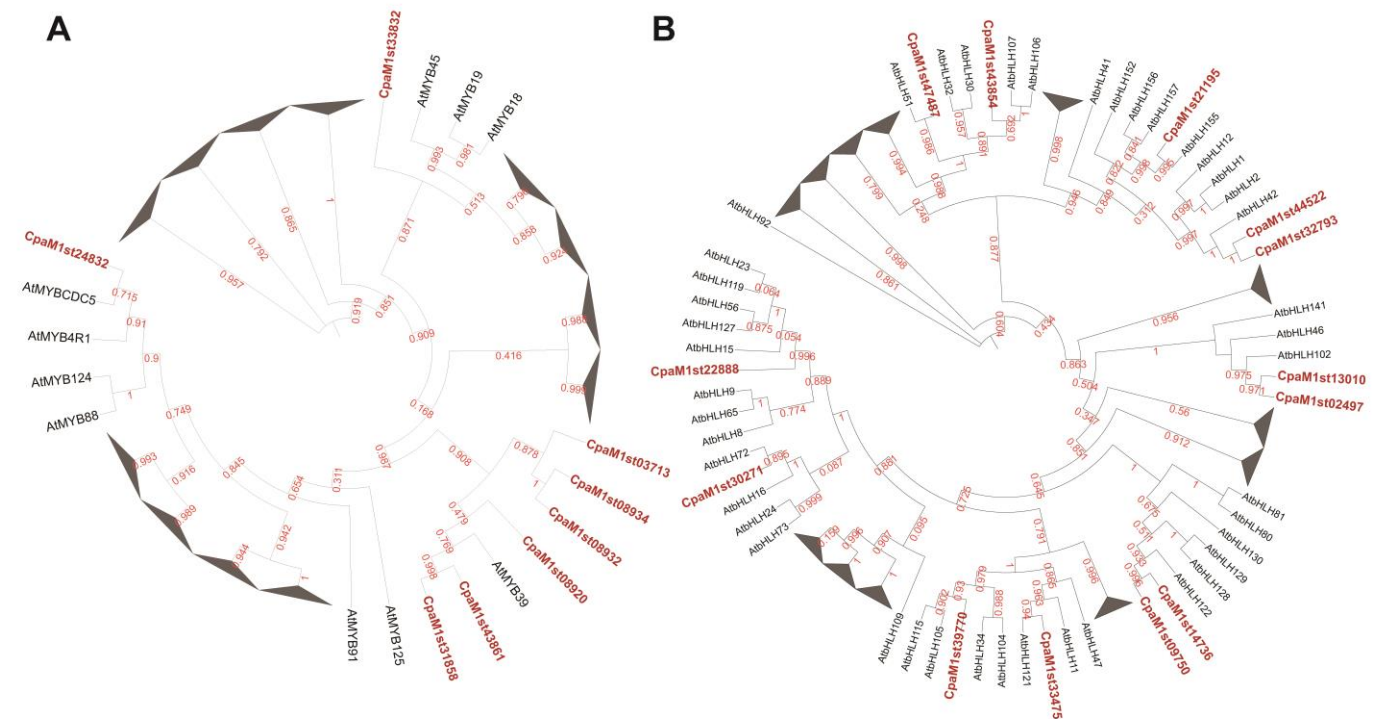

Figure S3. Phylogenetic tree of MYBs and bHLH obtained from *C. paliurus* and *A. thaliana*, the neighbor-joining method was used to construct the bootstrap (n = 1000). The DEGs mentioned in the manuscript are highlighted in red, while the evolutionary branches of genes not discussed in this study have been simplified as gray triangles.

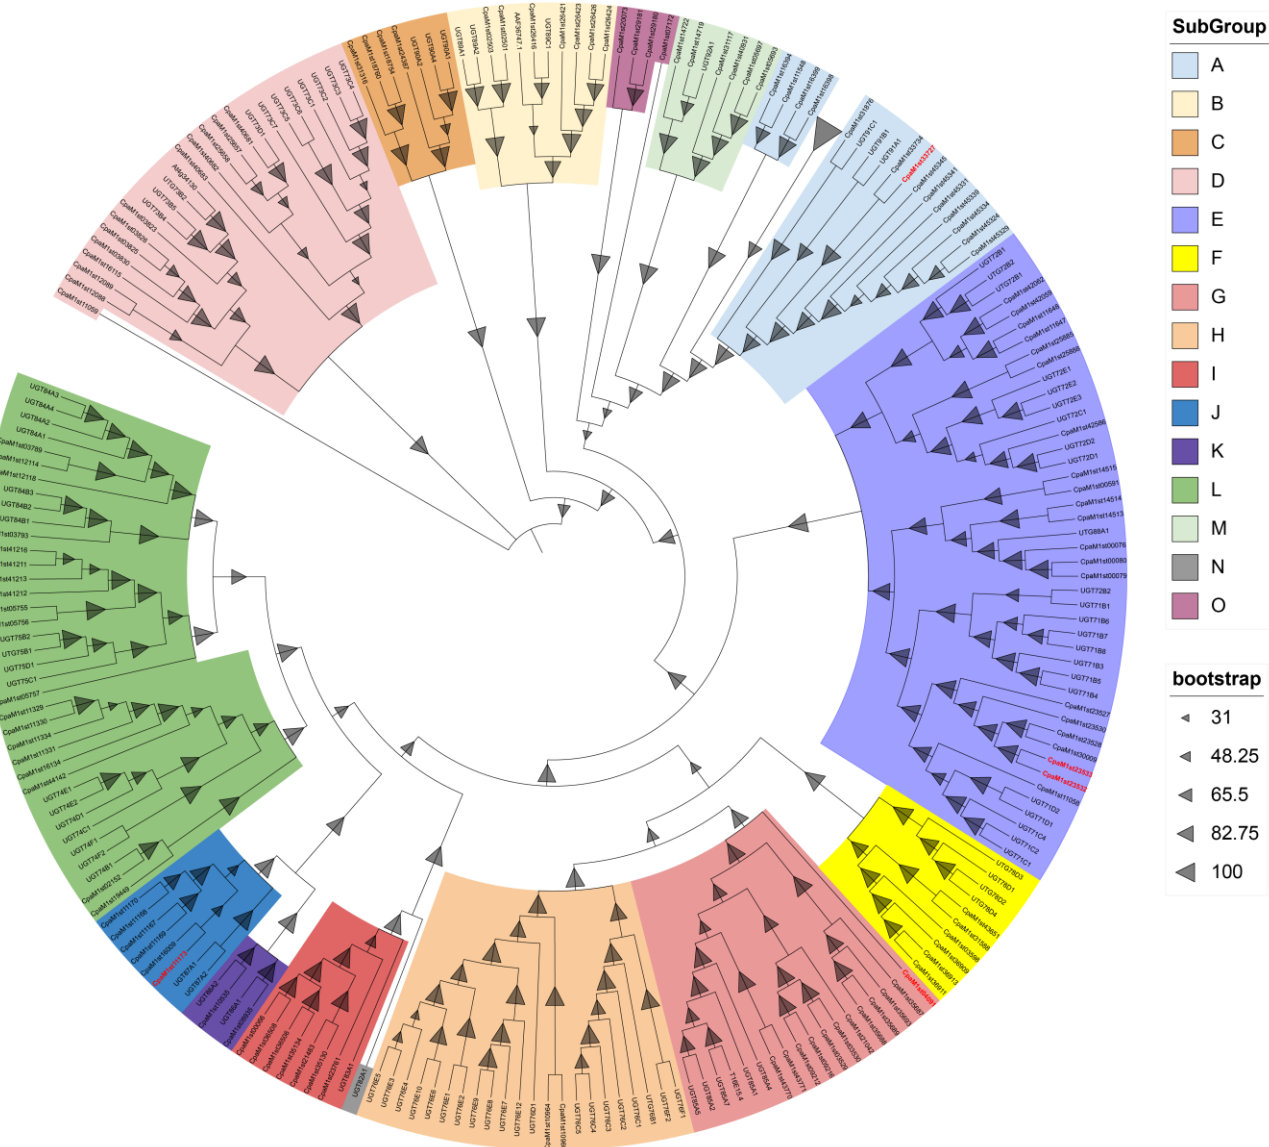

**Figure S4.** Phylogenetic tree of UGTs obtained from *C. paliurus* and *A. thaliana*, the neighbor-joining method was used to construct the bootstrap ( $n = 1000$ ). The DEGs mentioned in the manuscript are highlighted in red, while the evolutionary branches of genes not discussed in this study have been simplified as gray triangles. UGTs are divided into 15 subgroups, as outlined in Ross et al.'s [11] research.
